# Supplementary material for: Effects of fucoidans and alginates from Sargassum graminifolium on allergic symptoms and intestinal microbiota in mice with OVA-induced food allergy
Source: Royal Society of Chemistry journal article supplement (doi:10.1039/d2fo00802e), 2022-01-01
Supplement: d2fo00802e1.pdf [file d2fo00802e1.pdf]

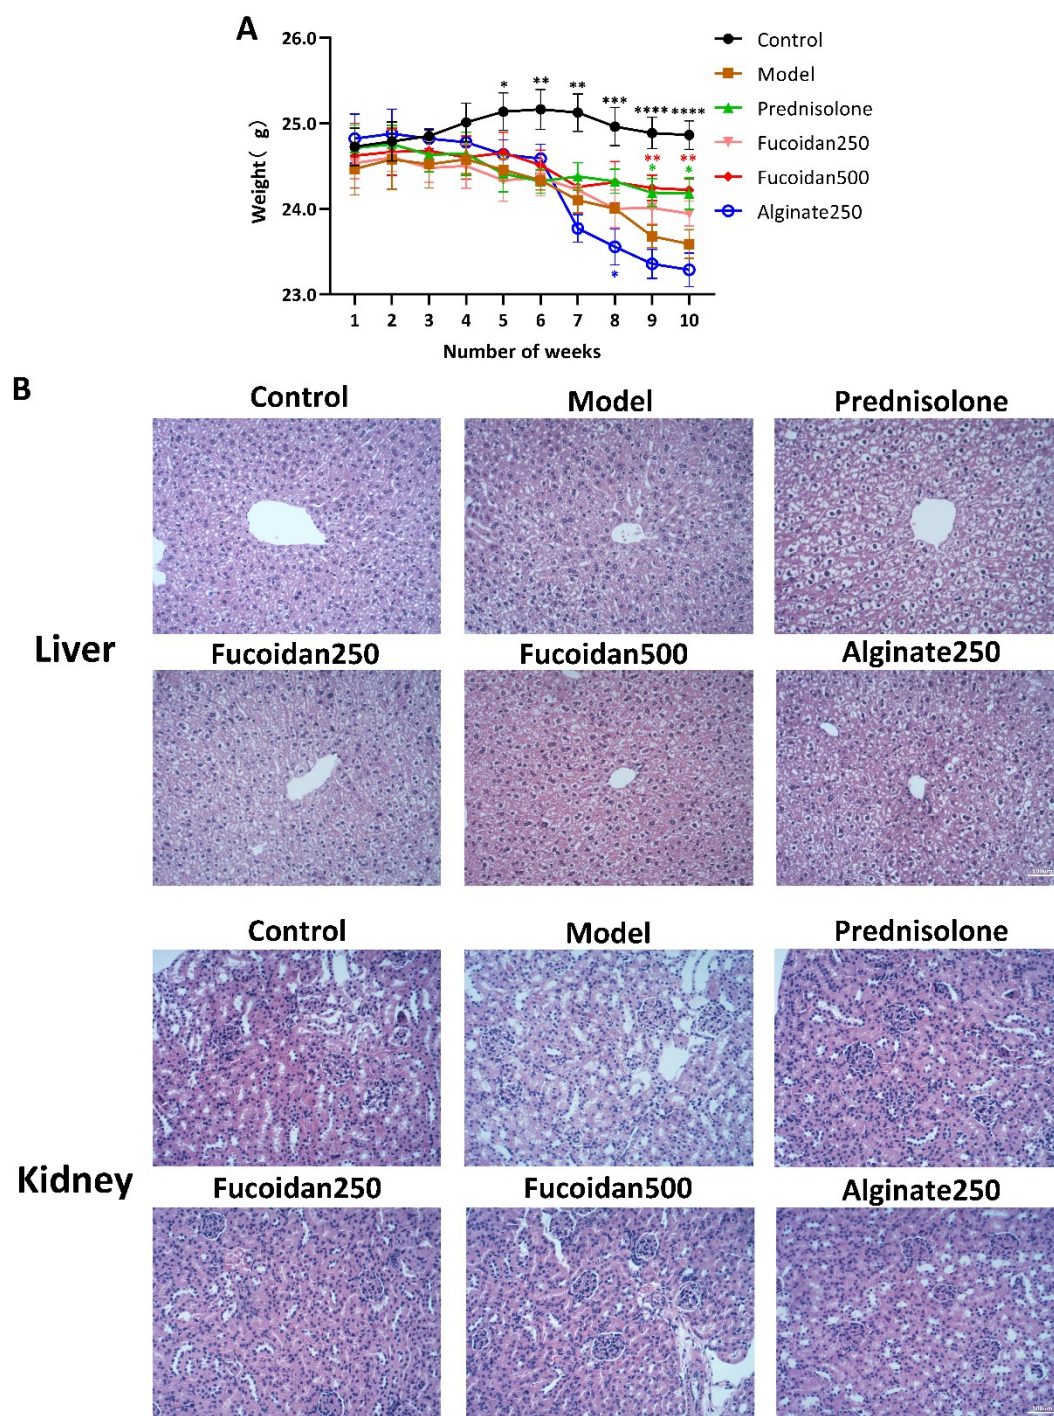

**Supplementary Fig 1. Changes of body weight (A) and pathological changes of liver and kidney (B) (200× microscopic observation) in mice.** The data was expressed as mean ± SEM (n=6); \* $p < 0.05$  vs model, \*\* $p < 0.01$  vs model, \*\*\* $p < 0.001$  vs model, \*\*\*\* $p < 0.0001$  vs model.
